# Supplementary material for: Role of Corneal Stromal Cells on Epithelial Cell Function during Wound Healing
Source: Int J Mol Sci. 2018 Feb 4;19(2):464. doi: 10.3390/ijms19020464 (PMC5855686; doi:10.3390/ijms19020464)
Supplement: Supplementary file 1 [file ijms-19-00464-s001.pdf]

## Suppl. information:

### Target list of the molecules analysed during antibody microarray:

| CD Marker | Gene name | CD Marker | Gene name | Chemokine / Cytokine | Gene name | Additional proteins | Gene name |
|-----------|-----------|-----------|-----------|----------------------|-----------|---------------------|-----------|
| CD1a      | LEU6      | CD50      | ICAM3     | GM-CSF               | CSF2      | ANCA                | PRTN3     |
| CD2       | SRBC      | CD52      | HE5       | IFN alpha            | IFNA1     | BDNF                | BDNF      |
| CD3       | T3G       | CD53      | TSPAN25   | IFN gamma            | IFNG      | Cox1                | PTGS1     |
| CD4       | LEU3      | CD54      | ICAM1     | IL-1alpha            | IL1A      | CYTL                | CYTL1     |
| CD5       | LEU1      | CD55      | DAF       | IL-1beta             | IL1B      | IgE                 | FCER1A    |
| CD6       | TP120     | CD56      | NCAM1     | IL-2                 | IL2       | HLA I               |           |
| CD7       | LEU9      | CD57      | B3GAT1    | IL-4                 | IL4       | HLA-ABC             |           |
| CD8       | MAL       | CD58      | LFA3      | IL-6                 | IL6       | HLA-DP              | HLA-DPB1  |
| CD9       | MIC3      | CD59      | MIC11     | IL-7                 | IL7       | HLA-DQ              |           |
| CD10      | MME       | CD61      | ITGB3     | IL-8                 | CXCL8     | HLA-DR              |           |
| CD11a     | ITGAL     | CD62L     | SELL      | IL-10                | IL10      | MPO                 | MPO       |
| CD11b     | ITGAM     | CD62p     | SELP      | IL-12B               | IL12B     | NT-4                | NTF4      |
| CD11c     | ITGAX     | CD63      | TSPAN30   | IL-13                | IL13      | NTAL                | LAT2      |
| CD13      | ANPEP     | CD66a     | CEACAM1   | IL-15                | IL15      | pan HLA-class II    |           |
| CD14      |           | CD66b     | CEACAM8   | IL-16                | IL16      | p53                 | TP53      |
| CD15      | FUT4      | CD66c     | CEACAM6   | IL-18                | IL18      | p72Syk              | SYK       |
| CD16      | FCGR3A    | CD66d     | CEACAM3   | IL-37                | IL37      | TRYG1               | TPSG1     |
| CD17      |           | CD66e     | CEACAM5   | LIF                  | LIF       | TSLPR               | CRLF2     |
| CD18      | ITGB2     | CD69      | CLEC2C    | TNF alpha            | TNF       | tTG                 | TGM2      |
| CD19      | LEU12     | CD70      | TNFSF7    | TSLP                 | TSLP      | VEGF                | VEGFA     |
| CD20      | MS4A1     | CD71      | TFRC      |                      |           |                     |           |
| CD21      | CR2       | CD72      | Lyb-2     | Eotaxin-1            | CCL11     |                     |           |
| CD22      | SIGLEC2   | CD79a     | MB1       | MIP-1 alpha          | CCL3      |                     |           |
| CD23      | FCER2     | CD80      | LAB7      | RANTES               | CCL5      |                     |           |
| CD24      |           | CD86      | LAB72     | MCP-2                | CCL8      |                     |           |
| CD25      | IL2RA     | CD95      | FAS       | MCP-3                | CCL7      |                     |           |
| CD27      | TNFRSF7   | CD97      |           | MIP-4                | CCL18     |                     |           |
| CD28      | TP44      | CD98      | SLC3A2    |                      |           |                     |           |
| CD29      | ITGB1     | CD99      | MIC2      |                      |           |                     |           |
| CD30      | TNFRSF8   | CD105     | ENG       |                      |           |                     |           |
| CD31      | PECAM1    | CD106     | VCAM1     |                      |           |                     |           |
| CD33      | SIGLEC3   | CD116     | CSF2RA    |                      |           |                     |           |
| CD34      |           | CD117     | KIT       |                      |           |                     |           |
| CD35      | CR1       | CD123     | IL3RA     |                      |           |                     |           |
| CD36      | GP3B      | CD131     | CSF2RB    |                      |           |                     |           |
| CD37      | TSPAN26   | CD137     | TNFRSF9   |                      |           |                     |           |
| CD38      | ADPRC 1   | CD139     |           |                      |           |                     |           |
| CD40      | TNFRSF5   | CD147     | BSG       |                      |           |                     |           |
| CD41      | ITGA2B    | CD162     | SELPLG    |                      |           |                     |           |
| CD42b     | GP1BA     | CD177     | NB1       |                      |           |                     |           |
| CD43      | SPN       | CD222     | IGF2R     |                      |           |                     |           |
| CD44      | MDU2      | CD223     | LAG3      |                      |           |                     |           |
| CD45      | PTPRC     | CD230     | PRNP      |                      |           |                     |           |
| CD46      | MCP       | CD235a    | GYPA      |                      |           |                     |           |
| CD47      | MER6      | CD235b    | GYPB      |                      |           |                     |           |

|       |       |       |         |
|-------|-------|-------|---------|
| CD48  | BCM1  | CD253 | TNFSF10 |
| CD49d | ITGA4 | CD274 | PDL1    |
|       |       | CD279 | PD1     |

**Suppl. Fig. 1**

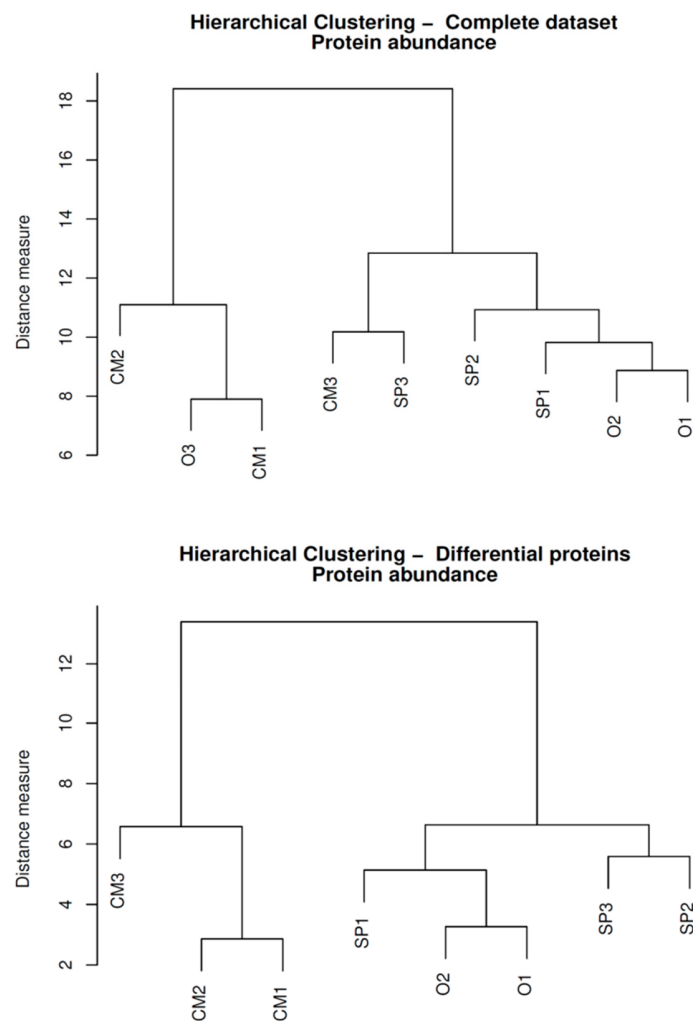

**Suppl. Fig.1:** Hierarchical clustering of the protein extracts based on the complete array data and differential abundance. O1, O2 and O3 represent control sample group. SP1, SP2 and SP3 represent substance P treated sample group. CM1, CM2 and CM3 represent keratocyte conditioned media (KSCM) treated sample group. The cluster analysis for the protein signal data of the complete data set reveals two main clusters. The samples from

group SP and O are clustering to the right whereas the CM sample group is located to the left. Sample O3 is classified as an outlier and filtered from the following analysis. A further cluster analysis was performed with only the differential data set which also revealed two main clusters. The cluster on the right contain samples from the O and SP group and on the left consists only of the CM sample group that was clearly separated from the other two groups.

Suppl. Fig. 2

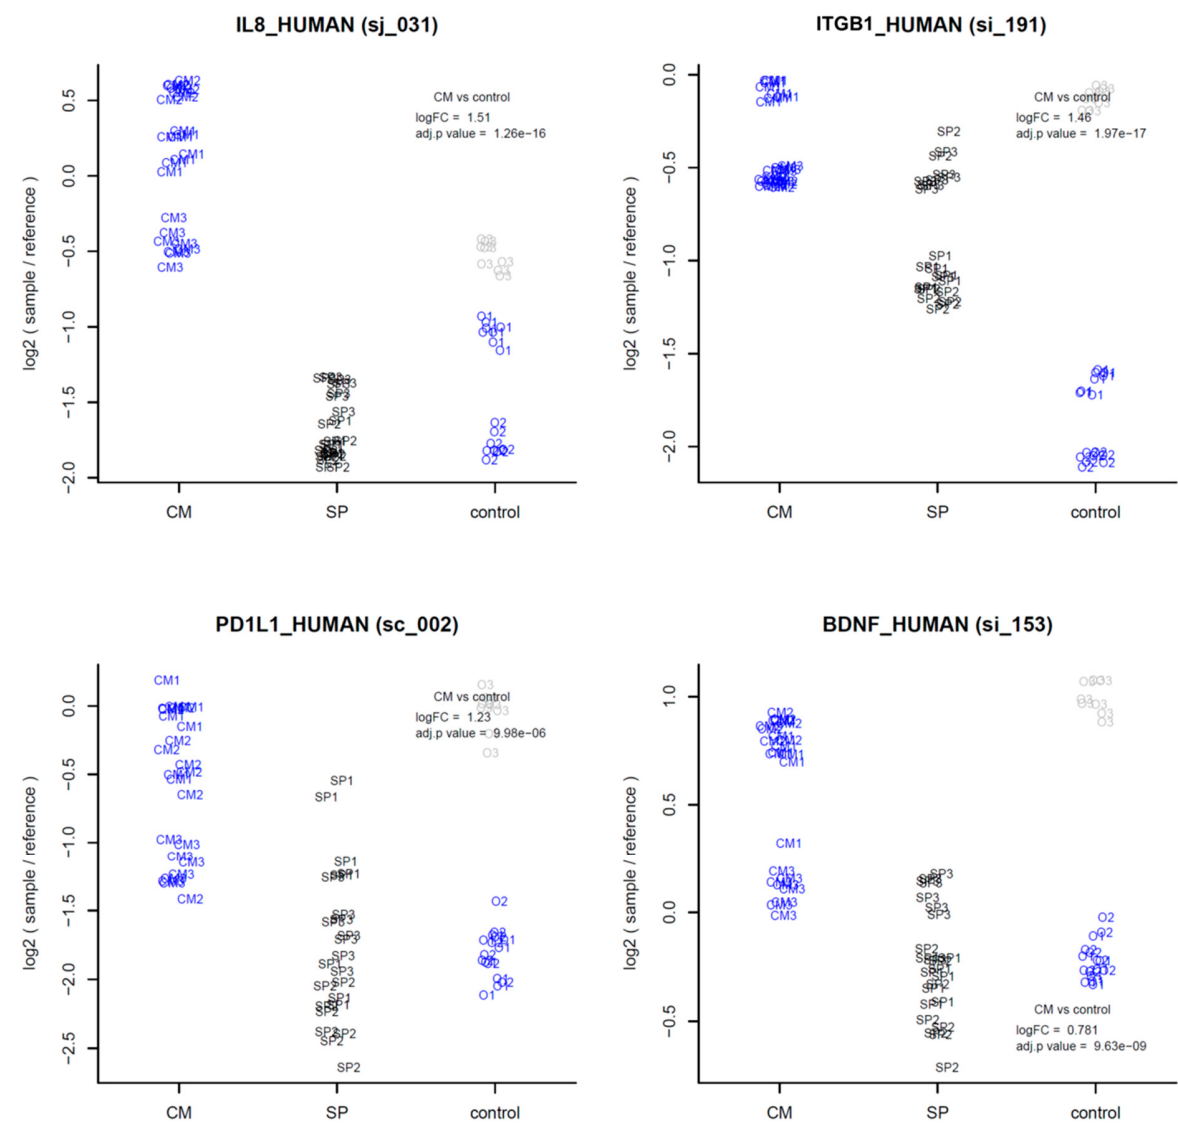

**Suppl. Fig.2:** Individual array values for a set of differentially expressed proteins. Each sample is measured by four replicate spots per array. Data are shown for proteins ITGB1 (upregulated after SP and KCM treatment), as well as IL8, PD1L1 and BDNF (upregulated after KCM treatment). The filtered sample O3 was also presented in the plots.

**Suppl. Fig. 3**

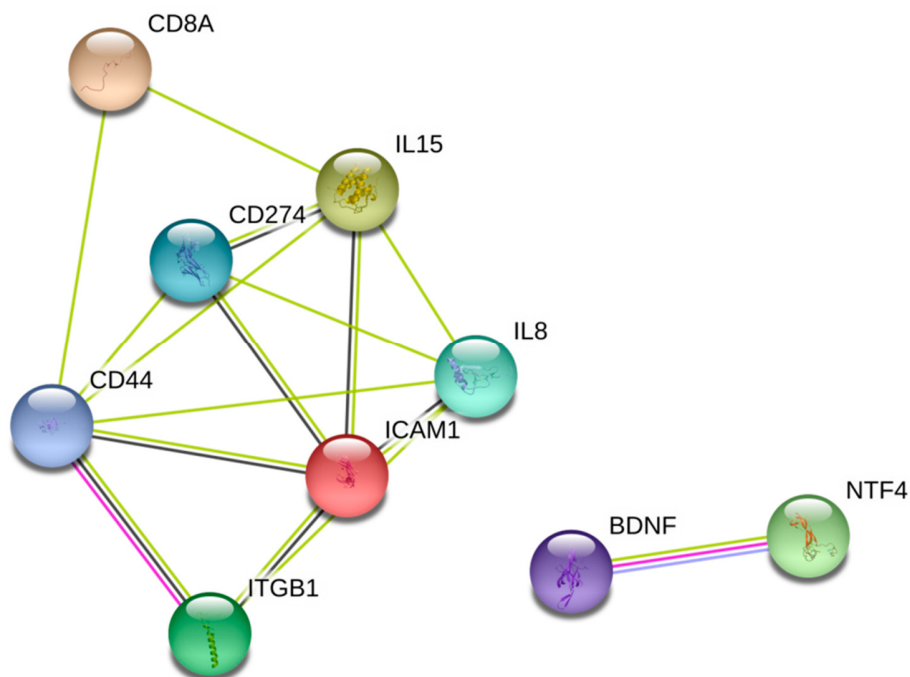

**Suppl. Figure 3.** Protein-protein interaction network obtained by STRING software (p-value = 6.37e-08). Differentially expressed abundant proteins, after 24-hour stimulation

of hTCEpi cells with SFCM, were identified by antibody microarray and their interaction analysis was performed using *version 10.5 of* the STRING database (<http://string-db.org>). Colored lines between proteins indicate different kinds of interaction evidence. Several direct, as well as indirect interactions of the differential proteins, were observed. In this network, nodes represent proteins and edges represent protein-protein associations. With 9 nodes and 13 edges, the represented interaction network displays more biologically connected protein interactions among themselves as well as a cluster.
